# Supplementary material
Source: PubMed Central journal article supplement (PMC11104158)
Supplement: sj-pdf-1-jfm-10.1177_1098612X14541263.pdf [file sj-pdf-1-jfm-10.1177_1098612X14541263.pdf]

**FELINE USG STUDY DATA COLLECTION FORM**

Circle/mark the correct response, or fill in the required information.

1. **Is this cat considered healthy by you and the client/owner?**  
YES Proceed to next question  
NO This patient is not eligible for this study
  
2. **Does this cat currently have or has it ever had any conditions that require chronic medical management other than mild or moderate periodontal disease?**  
No proceed to next question  
Yes please specify
  
3. **Why did the owner present the cat to you at this visit?**  
Annual wellness examination or vaccination  
Examination prior to elective anesthetic procedure (e.g. spay or neuter, declaw etc)  
Boarding  
Grooming  
Other please specify
  
4. **Was the patient fasted prior to this visit?**  
Yes, both food and water were withheld for >8 hours  
Yes, but only food was withheld for >8 hours  
No
  
5. **Breed** \_\_\_\_\_
  
6. **Unique identifier (case #, patient name etc)** \_\_\_\_\_
  
7. **Age (years)** \_\_\_\_\_
  
8. **Gender**  
FI  
FS  
MI  
MC
  
9. **What was the USG?** \_\_\_\_\_
  
10. **When was the urine sample obtained?**  
First morning  
Mid- or late-morning  
Afternoon  
Evening

**11. Was the USG >1.035?**

**YES** If yes, proceed to Question 14.

**NO** If no, proceed to Question 12.

**12. If USG was <1.035, did you identify a MEDICAL or BEHAVIORAL reason for the USG that was LESS THAN 1.035?**

Yes, a medical reason was identified

Yes, a behavioral reason was identified

I could find no medical or behavioral reason for the low USG

I did not look for a medical or behavioral reason

Please specify the medical or behavioral reason identified

---

**13. Did you re-examine the USG the following morning as a first-void sample?**

**YES** Report the USG \_\_\_\_\_

**NO**

**14. What type of diet does this patient consume?**

Exclusively canned food

Mostly canned food

Equal mix of canned and dry food

Mostly dry food

Exclusively dry food

Other – please specify \_\_\_\_\_

**15. Which of these does the client/owner believe best describes this cat?**

Exclusively indoor

Mostly indoor

Equally indoor and outdoor

Mostly outdoor

Exclusively outdoor

**16. How does the owner/client classify this cat's drinking habit?**

It hardly ever drinks water from a water bowl or other source

It drinks a normal amount from available water sources

It drinks avidly from available water sources

It has to be actively restricted from drinking excessively from available water sources

Please use the Online data submission system to upload the data for this patient at your convenience.

Thank you and your client for participating in this study.
